# Supplementary material for: An integrated homogeneous SPARCL™ immunoassay for rapid biomarker detection on a chip
Source: Royal Society of Chemistry journal article supplement (doi:10.1039/c9ay00198k), 2019-01-01
Supplement: c9ay00198k1.pdf [file c9ay00198k1.pdf]

## SUPPLEMENTARY INFORMATION

for the article “An integrated homogeneous SPARCL™ immunoassay for the rapid biomarker detection on a chip” (by Natalia Sandetskaya, Nicole Isserstedt-John, Andreas Kölsch, Sebastian Schattschneider and Dirk Kuhlmeier)

### 1. Custom-made luminometer for the SPARCL™ measurements on a chip

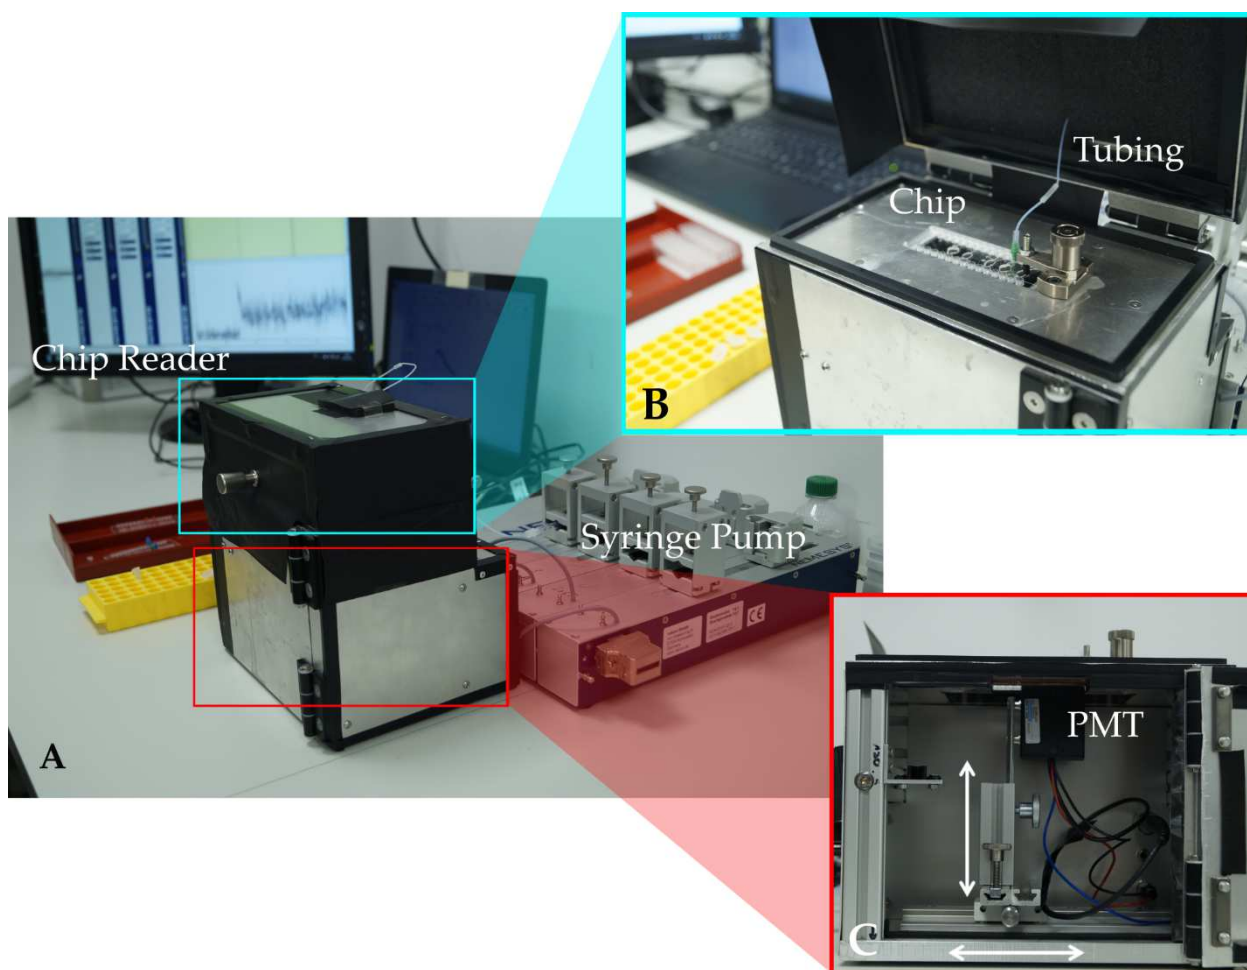

**Fig. S1** Custom-made luminometer for the SPARCL™ measurements on the chip. A: Overview of the instrument with the closed lid. B: Chip positioning on the top panel of the instrument and its connection to the syringe pump. C: Luminometer with the side panel opened.

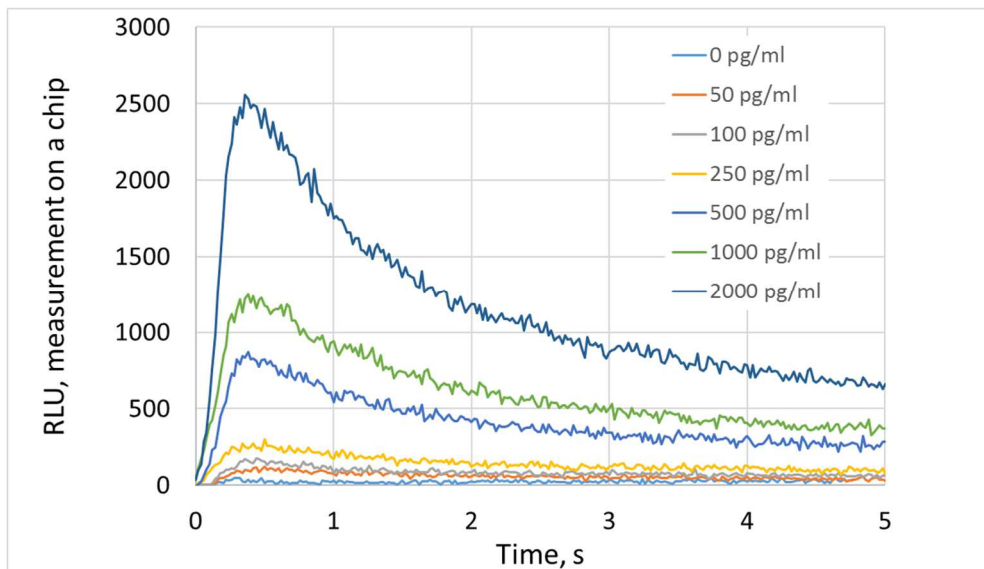

**Fig. S2** Exemplary signal development for various concentration of TIMP1 after injection of the trigger at 0 s.

## 2. Determination of the limits of detection and quantification for SPARCL™ on a chip

Ten replicates of blank samples were measured on the chip (Supplementary table 1, A). Additionally, TIMP1 dilutions in the range 50-2000 pg/ml were prepared in PBS and measured in five replicates of each concentration (Supplementary table 1, B).

**Supplementary table 1.** Calibration of SPARCL™ on a chip. A: Estimation of the noise luminescence  $S_0$ . B: calibration for the analytical range of TIMP1 concentration.

A

| S <sub>0</sub>                 | S <sub>0</sub> , RLU |
|--------------------------------|----------------------|
| 0_1                            | 47,5                 |
| 0_2                            | 49,2                 |
| 0_3                            | 45,4                 |
| 0_4                            | 33,9                 |
| 0_5                            | 44,9                 |
| 0_6                            | 91,4                 |
| 0_7                            | 35,7                 |
| 0_8                            | 65,0                 |
| 0_9                            | 47,0                 |
| 0_10                           | 50,2                 |
| <b>Average S/S<sub>0</sub></b> | <b>51,0</b>          |
| SD                             | 16,5                 |

B

| TIMP1, pg/ml | Average RLU | SD (RLU) | S/S <sub>0</sub> | SD (S/S <sub>0</sub> ) |
|--------------|-------------|----------|------------------|------------------------|
| <b>0</b>     | 51,0        | 16,5     | <b>1,0</b>       | 0,3                    |
| <b>50</b>    | 119,4       | 34,0     | <b>2,3</b>       | 0,7                    |
| <b>100</b>   | 204,4       | 68,7     | <b>4,0</b>       | 1,3                    |
| <b>250</b>   | 236,6       | 74,2     | <b>4,6</b>       | 1,5                    |
| <b>500</b>   | 819,8       | 126,0    | <b>16,1</b>      | 2,5                    |
| <b>1000</b>  | 1185,1      | 71,2     | <b>23,2</b>      | 4,8                    |
| <b>2000</b>  | 2017,0      | 247,1    | <b>39,5</b>      | 14,1                   |

The average  $S/S_0$  (Supplementary table 1, B) were used for the calibration curve (Fig. S2). Using the acquired data, the limit of detection LOD and limit of quantification LOQ were determined as follows:

$$\text{LOD} = \text{Average } S_0 + 3 \cdot \text{SD}$$

$$\text{LOQ} = \text{Average } S_0 + 10 \cdot \text{SD},$$

where SD is a standard deviation for serial measurements of the signal for the blank sample  $S_0$ .

$$\text{LOD (RLU)} = 51 + 3 \cdot 16.5 = 100.5 \text{ RLU}$$

$$\text{LOD (S/S}_0) = 100.5/51 \approx 2$$

$$\text{LOD (TIMP1, pg/ml)} = (2-1)/0.0203 = 49.3 \text{ pg/ml}$$

$$\text{LOQ (RLU)} = 51 + 10 \cdot 16.5 = 216 \text{ RLU}$$

$$\text{LOQ (S/S}_0) = 216/51 \approx 4.2$$

$$\text{LOQ (TIMP1, pg/ml)} = (4.2-1)/0.0203 = 157.6 \text{ pg/ml}$$

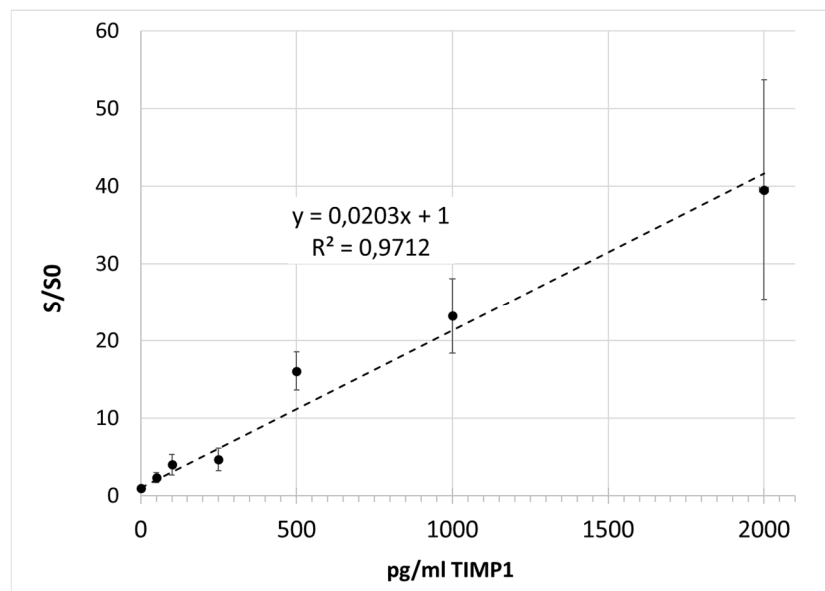

**Fig. S3** Calibration curve for the homogeneous SPARCL™ for the quantitative detection of TIMP1 on a chip. The error bars designate the standard deviation, number of replicates  $n=5$ .
